# Supplementary material for: Synthesis and Characterization of High-Energy Anti-Perovskite Compounds Cs3X[B12H12] Based on Cesium Dodecahydro-Closo-Borate with Molecular Oxoanions (X− = [NO3]−, [ClO3]− and [ClO4]−)
Source: MDPI journal article supplement (doi:10.3390/molecules29020382), 2024-01-12
Supplement: s1 [file s1]

**Table S1.** Atomic coordinates and coefficients of the equivalent isotropic displacement parameters for Cs<sub>3</sub>[NO<sub>3</sub>][B<sub>12</sub>H<sub>12</sub>] (**I**).

| Atom | Wyckoff site | $x/a$      | $y/b$      | $z/c$        | $U_{eq}/\text{pm}^2$ |
|------|--------------|------------|------------|--------------|----------------------|
| Cs1  | 4c           | 0.26627(5) | $1/4$      | 0.57549(2)   | 434.2(14)            |
| Cs2  | 8d           | 0.22713(4) | 0.00310(2) | 0.341697(17) | 423.2(13)            |
| N    | 4c           | 0.0534(7)  | $1/4$      | 0.7513(3)    | 448(11)              |
| O1   | 4c           | 0.0646(9)  | $1/4$      | 0.8230(3)    | 786(17)              |
| O2   | 8d           | 0.0661(8)  | 0.1473(5)  | 0.7156(3)    | 1008(17)             |
| B1   | 4c           | 0.1646(7)  | $1/4$      | 0.1788(3)    | 346(11)              |
| H1   | 4c           | 0.116      | $1/4$      | 0.237        | 416                  |
| B2   | 4c           | 0.0418(7)  | $1/4$      | 0.0962(3)    | 329(11)              |
| H2   | 4c           | -0.088     | $1/4$      | 0.100        | 395                  |
| B3   | 4c           | 0.4384(7)  | $1/4$      | 0.0823(3)    | 304(11)              |
| H3   | 4c           | 0.568      | $1/4$      | 0.078        | 365                  |
| B4   | 4c           | 0.3180(7)  | $1/4$      | 0.0006(3)    | 349(11)              |
| H4   | 4c           | 0.368      | $1/4$      | -0.057       | 418                  |
| B5   | 8d           | 0.3395(5)  | 0.1649(4)  | 0.1556(2)    | 328(8)               |
| H5   | 8d           | 0.404      | 0.110      | 0.199        | 393                  |
| B6   | 8d           | 0.3266(5)  | 0.1116(4)  | 0.0598(2)    | 345(8)               |
| H6   | 8d           | 0.382      | 0.022      | 0.041        | 413                  |
| B7   | 8d           | 0.1549(5)  | 0.1116(4)  | 0.1195(2)    | 325 (8)              |
| H7   | 8d           | 0.099      | 0.022      | 0.139        | 390                  |
| B8   | 8d           | 0.1411(5)  | 0.1648(4)  | 0.0231(2)    | 371(8)               |
| H8   | 8d           | 0.077      | 0.110      | -0.020       | 445                  |

**Table S2.** Atomic coordinates and coefficients of the equivalent isotropic displacement parameters for Cs<sub>3</sub>[ClO<sub>3</sub>][B<sub>12</sub>H<sub>12</sub>] (**II**).

| Atom | Wyckoff site | $x/a$      | $y/b$      | $z/c$       | $U_{eq}/\text{pm}^2$ |
|------|--------------|------------|------------|-------------|----------------------|
| Cs1  | 4c           | 0.26127(7) | $1/4$      | 0.57179 (4) | 497(3)               |
| Cs2  | 8d           | 0.23179(5) | 0.00982(5) | 0.34315(3)  | 475(2)               |
| Cl   | 4c           | 0.0097(2)  | $1/4$      | 0.75085(13) | 470(6)               |
| O1   | 4c           | 0.0740(9)  | $1/4$      | 0.8277(4)   | 678(22)              |
| O2   | 8d           | 0.0738(7)  | 0.1394(5)  | 0.7119(3)   | 717(17)              |
| B1   | 4c           | 0.1668(11) | $1/4$      | 0.1770(6)   | 35(2)                |
| H1   | 4c           | 0.119      | $1/4$      | 0.235       | 422                  |
| B2   | 4c           | 0.0411(11) | $1/4$      | 0.0975(6)   | 394(22)              |
| H2   | 4c           | -0.089     | $1/4$      | 0.103       | 469                  |
| B3   | 4c           | 0.4394(11) | $1/4$      | 0.0829(6)   | 360(23)              |
| H3   | 4c           | 0.570      | $1/4$      | 0.079       | 432                  |
| B4   | 4c           | 0.3179(11) | $1/4$      | 0.0011(6)   | 411(26)              |
| H4   | 4c           | 0.369      | $1/4$      | 0.944       | 493                  |
| B5   | 8d           | 0.3379(8)  | 0.1663(7)  | 0.1551(4)   | 350(17)              |
| H5   | 8d           | 0.402      | 0.112      | 0.198       | 422                  |
| B6   | 8d           | 0.3259(8)  | 0.1155(7)  | 0.0600(4)   | 399(18)              |
| H6   | 8d           | 0.382      | 0.028      | 0.041       | 478                  |
| B7   | 8d           | 0.1556(8)  | 0.1144(7)  | 0.1187(4)   | 419(19)              |
| H7   | 8d           | 0.100      | 0.027      | 0.137       | 503                  |
| B8   | 8d           | 0.1412(8)  | 0.1666(7)  | 0.0229(4)   | 391(18)              |
| H8   | 8d           | 0.076      | 0.113      | -0.0201     | 469                  |

**Table S3.** Atomic coordinates and coefficients of the equivalent isotropic displacement parameters for Cs<sub>3</sub>[ClO<sub>4</sub>][B<sub>12</sub>H<sub>12</sub>] (**III**).

| Atom | Wyckoff site | $x/a$      | $y/b$        | $z/c$        | $U_{eq}/\text{pm}^2$ |
|------|--------------|------------|--------------|--------------|----------------------|
| Cs1  | 4c           | 0.27314(3) | $1/4$        | 0.571528(17) | 372.8(10)            |
| Cs2  | 8d           | 0.22891(2) | 0.007474(18) | 0.342365(12) | 342.1(9)             |
| Cl   | 4c           | 0.01695(9) | $1/4$        | 0.74841(6)   | 258(2)               |
| O1   | 4c           | 0.0690(3)  | $1/4$        | 0.82737(17)  | 376(7)               |
| O2   | 4c           | 0.3561(3)  | $1/4$        | 0.7515(18)   | 416(8)               |
| O3   | 8d           | 0.0696(2)  | 0.13879(19)  | 0.70885(12)  | 359(5)               |
| B1   | 4c           | 0.1765(5)  | $1/4$        | 0.1822(3)    | 272(10)              |
| H1   | 4c           | 0.131(5)   | $1/4$        | 0.246(3)     | 405(125)             |
| B2   | 4c           | 0.0526(5)  | $1/4$        | 0.1011(3)    | 292 (11)             |
| H2   | 4c           | 0.424(4)   | $1/4$        | 0.392(2)     | 161(94)              |
| B3   | 4c           | 0.4292(5)  | $1/4$        | 0.0800(3)    | 272(10)              |
| H3   | 4c           | 0.056(5)   | $1/4$        | 0.423(2)     | 335(121)             |
| B4   | 4c           | 0.3093(5)  | $1/4$        | 0.9982(3)    | 305 (11)             |
| H4   | 4c           | 0.352(5)   | $1/4$        | 0.938(3)     | 348(12)              |
| B5   | 8d           | 0.3404(4)  | 0.1656(3)    | 0.15604(19)  | 262(7)               |
| H5   | 8d           | 0.402(3)   | 0.114(3)     | 0.207(17)    | 225(73)              |
| B6   | 8d           | 0.3204(4)  | 0.1127(3)    | 0.0585(2)    | 2867(7)              |
| H6   | 8d           | 0.367(4)   | 0.022(3)     | 0.0397(18)   | 391(91)              |
| B7   | 8d           | 0.1625(4)  | 0.1129(3)    | 0.1222(2)    | 2770(72)             |
| H7   | 8d           | 0.111(4)   | 0.020(3)     | 0.1449(18)   | 430(100)             |
| B8   | 8d           | 0.1430(4)  | 0.1657(3)    | 0.0240(2)    | 316(8)               |
| H8   | 8d           | 0.075(3)   | 0.111(3)     | 0.9801(18)   | 402(88)              |

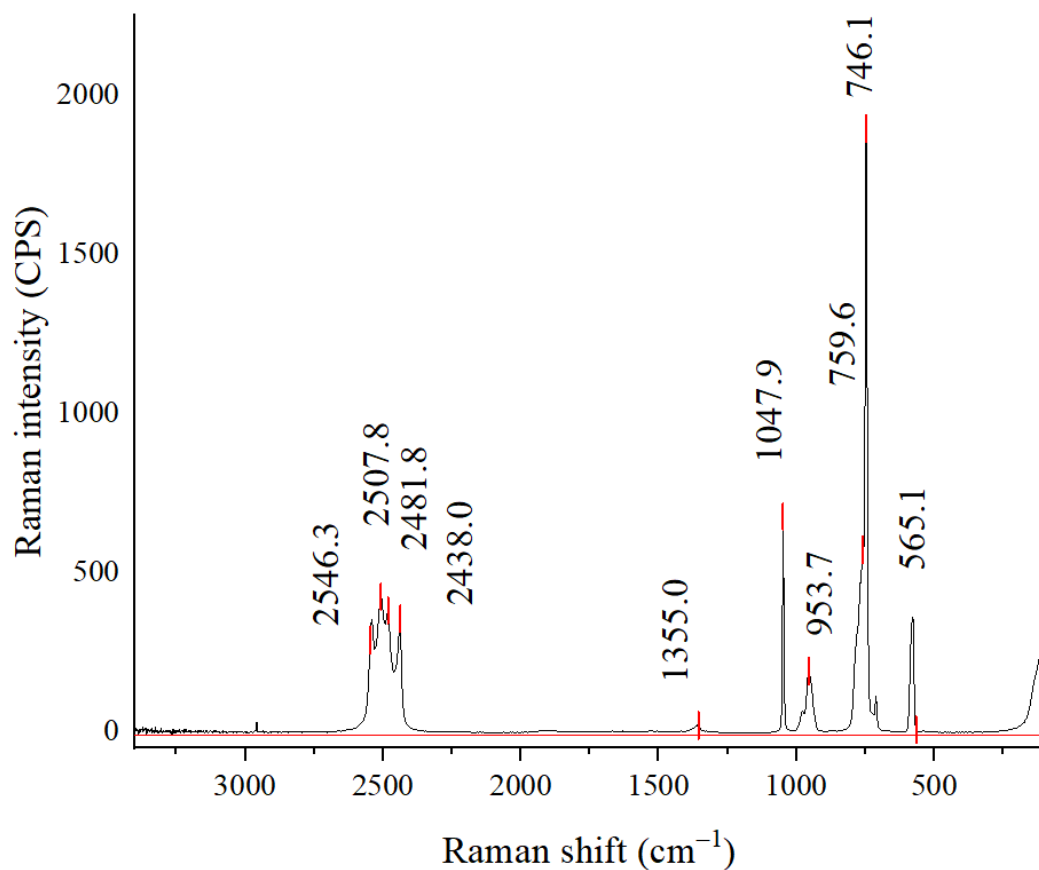**Figure S1.** Raman spectrum of Cs<sub>3</sub>[NO<sub>3</sub>][B<sub>12</sub>H<sub>12</sub>] (**I**).

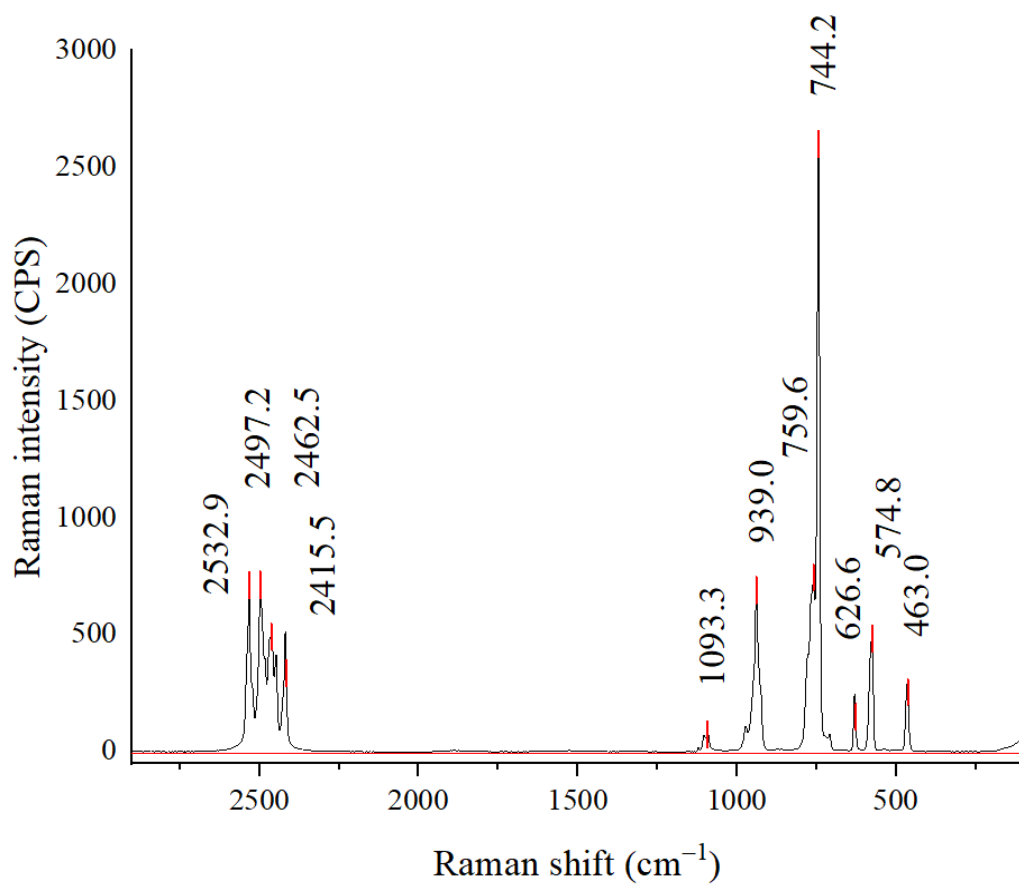

**Figure S2.** Raman spectrum of  $\text{Cs}_3[\text{ClO}_4][\text{B}_{12}\text{H}_{12}]$  (**III**).
